# Supplementary material for: Two Phosphoglucomutase Paralogs Facilitate Ionophore-Triggered Secretion of the Toxoplasma Micronemes
Source: PubMed Central journal article supplement (PMC5705807; doi:10.1128/msphere.00521-17), 2017-11-29
Supplement: sph006172414st1.pdf [file sph006172414st1.pdf]

**Table S1**

| <i>Primer name</i>                                       | <i>Sequence (restriction enzyme sites underlined)</i> |
|----------------------------------------------------------|-------------------------------------------------------|
| <b>Tagging of the PRP1 endogenous locus</b>              |                                                       |
| PRP1-LIC-F                                               | TACTTCCAATCCAATTTAATGCCAGCTACGAAGGAAACAGA             |
| PRP1-LIC-R                                               | TCCTCCACTTCCAATTTTAGCCGTAATGACAGTTGGCGTCT             |
| PRP1-int-chk-F                                           | CGAAGAGTCTTTCGGCACAGGAAGCG                            |
| <b>Generation and verification of knockout of PRP1</b>   |                                                       |
| 5'PRP1-KpnI-F                                            | CAGGGTACCACGCAGAAAGTGCAGCTCTTG                        |
| 5'PRP1-KpnI-R                                            | CAGGGTACCGGAAGCCTCGGTTTCTTCC                          |
| 3'PRP1-SacI-F                                            | CAGGAGCTCGACGGGTGTTGCTGCTTTTTTC                       |
| 3'PRP1-SacI-R                                            | CAGGAGCTCGAGAAACACTGTA CTCTGACAAATG                   |
| Xho-tub-FnsI                                             | CAGCTC GAGGACATGCATGTCCCGCG                           |
| Xho-3dhfr-R                                              | TCGCCTC GAGCTAGAACTAGCTAGTGGAC                        |
| PRP1-EcoRV-F                                             | CAGGATATCAAATGGGGCCAAGGCAAGC                          |
| PRP1-EcoRV-R                                             | CAGGATATCCGTAATGACAGTTGGCGTCT                         |
| HXGPRTseq-R                                              | CCTTGCCCTTGCCGTAGTC                                   |
| <b>Generation of PRP1 specific antiserum</b>             |                                                       |
| aPRP1-LIC-F                                              | GGTCCTGGTTCGTGCATGGGTGATGTGGAG                        |
| aPRP1-LIC-R                                              | CTTGTCGTGCTGTTTATTACGTAATGACAGTTGGCGTC                |
| <b>Generation and verification of knockout of PGM2</b>   |                                                       |
| 5'TgPGM2-UTR-F                                           | GGCCGTTGTGTCCACTTCCCGGTC ACTCGAGGTCGACGGTATCG         |
| 3'PGM2-UTR-R                                             | GTGCACGCGTTAGATGCTTATGCGGCCGCTCTAGAACTAG              |
| 5PGM2-dKO-s                                              | AAGTTGTCCGGTTCCTCACAAGCGG                             |
| 5PGM2-dKO-as                                             | AAAACCGCTTGTGAGGGAACCGGACA                            |
| 3PGM2-dKO-s                                              | AAGTTGATCCAGGTCACACTCTGATG                            |
| 3PGM2-dKO-as                                             | AAAACATCAGAGTGTGACCTGGATCA                            |
| 5'PGM2-dKO-int-F                                         | GTCACGTAGACGGTGGACG                                   |
| 5'PGM2-dKO-int-R                                         | GCTGAACTCACCTGGGTAG                                   |
| 3'PGM2-dKO-int-F                                         | CATTTCCAGGAAAACGGCTGC                                 |
| 3'PGM2-dKO-int-R                                         | CAACTCGACACCCGAAACAG                                  |
| <b>Generation of Myc2-tagged PGM2 expression plasmid</b> |                                                       |
| PGM2-AvrII-F                                             | CAGCCTAGGAAAATGTCTGTCTGCAACAGAAAG                     |
| PGM2-EcoRV-R                                             | CAGGATATCTCAGAGTGTGACCTGGATCG                         |
